1 **Molnupiravir (EIDD-2801) inhibits SARS-CoV-2 replication and enhances the efficacy of favipiravir in**  
2 **a Syrian hamster infection model**

3 Rana Abdelnabi<sup>1#\*</sup>, Caroline S. Foo<sup>1#</sup>, Suzanne J. F. Kaptein<sup>1</sup>, Xin Zhang<sup>1</sup>, Lana Langendries<sup>1</sup>, Laura  
4 Vangeel<sup>1</sup>, Valentijn Vergote<sup>1</sup>, Elisabeth Heylen<sup>1</sup>, Pieter Leyssen<sup>1</sup>, Kai Dallmeier<sup>1</sup>, Lotte Coelmont<sup>1</sup>, Dirk  
5 Jochmans<sup>1</sup>, Arnab K. Chatterjee<sup>2</sup>, Steven De Jonghe<sup>1</sup>, Birgit Weynand<sup>3</sup>, Johan Neyts<sup>1\*</sup>.

6 1. KU Leuven Department of Microbiology, Immunology and Transplantation, Rega Institute for  
7 Medical Research, Laboratory of Virology and Chemotherapy, B-3000 Leuven, Belgium.

8 2. Calibr at Scripps Research, La Jolla, CA, USA.

9 3. KU Leuven Department of Imaging and Pathology, Translational Cell and Tissue Research, B-3000  
10 Leuven, Belgium; Division of Translational Cell and Tissue Research.

11 **#R.A. and C.S.F. contributed equally to this work**

12 \*To whom correspondence may be addressed. Email: [rana.abdelnabi@kuleuven.be](mailto:rana.abdelnabi@kuleuven.be) and  
13 [johan.neyts@kuleuven.be](mailto:johan.neyts@kuleuven.be).

14 **Author Contributions**

15 R.A., C.S.F. and J.N. designed research; R.A., C.S.F., S.J.F.K., X.Z. and L.L. performed research; R.A., C.S.F.  
16 and B.W. analyzed data; J.N. provided advice on the interpretation of data; R.A., C.S.F. and J.N. wrote  
17 the paper with input from co-authors; A.K.C. and S.D.J provided essential reagents; V.G. and E.H.  
18 provided and facilitated access to essential infrastructure; R.A., C.S.F. and J.N. supervised the study;  
19 L.V., L.C., P.L., J.N. and K.D. acquired funding.

20

21 **Abstract**

22 Since its emergence in Wuhan, China in December 2019, the severe acute respiratory syndrome  
23 coronavirus 2 (SARS-CoV-2) has spread worldwide resulting in a global pandemic with >2 million deaths  
24 within a year of the emergence of the virus. In the search for small molecule inhibitors of SARS-CoV-2  
25 Molnupiravir (EIDD-2801), an orally bioavailable nucleoside analog that was originally developed as  
26 an antiviral against influenza viruses but that exerts also activity against a number of other RNA viruses,  
27 including SARS-CoV2 and other coronaviruses. We here report on the effect of EIDD-2801 in a well-  
28 established Syrian hamster SARS-CoV-2 infection model. Oral treatment of SARS-CoV-2-infected  
29 hamsters with EIDD-2801 for four consecutive days, starting from the day of infection, significantly  
30 reduced infectious virus titers and viral RNA loads in the lungs and markedly improved lung  
31 histopathology in a dose-dependent manner when assessed at 4 dpi. When onset of treatment with  
32 500 mg/kg/dose was delayed until 24h post-infection, a modest but significant antiviral effect was  
33 observed. When suboptimal doses of both favipiravir (300 mg/kg, BID) and EIDD-2801 (150 mg/kg, BID)  
34 were combined, a complete reduction ( $\sim 5 \log_{10}$ ) of infectious virus titers was observed in the lungs of  
35 most of the combo-treated animals whereas either compound alone resulted in a reduction of  
36 respectively 1.2 and 1.3  $\log_{10}$ . The potential of EIDD-2801 for the treatment and/or prevention of SARS-  
37 CoV-2 alone or in combination with favipiravir deserves further attention.

38 **Keywords**

39 SARS-CoV-2; Antivirals; EIDD-2801; MK-4482; Molnupiravir; preclinical model.

## 40 **Introduction**

41 The severe acute respiratory syndrome coronavirus 2 (SARS-CoV-2) is a  $\beta$ -coronavirus that was first  
42 identified in Wuhan, China in December 2019 (1). Since then, the virus rapidly spread around the globe  
43 with more than 96 million cases reported by the end of 2020 and 2 million deaths one year after the  
44 emergence of the virus [<https://covid19.who.int/>]. Infection with SARS-CoV-2 results in coronavirus-  
45 induced disease (COVID-19) which is characterized by a wide range of symptoms including fever, dry  
46 cough, muscle and/or joint pain, headache, decreased sense of taste and smell and diarrhea. The  
47 disease can also progress into severe complications such as acute respiratory distress syndrome  
48 (ARDS), respiratory failure, septic shock and multi-organ failure, which are mainly attributed to a  
49 massive cytokine storm and exaggerated immune response (2).

50 To date, there are no approved, selective coronavirus antivirals to treat or prevent infections. The use  
51 of potent antivirals against SARS-CoV-2 will reduce viral loads and may hence reduce the chance to  
52 progress to a severe disease. In addition, such antiviral drugs could be useful to protect for example  
53 health care workers and high-risk groups in a prophylactic setting. Since the *de novo* development and  
54 approval of (a) specific, highly potent antiviral(s) for SARS-CoV-2 requires years, the main focus for  
55 COVID-19 treatment in the current pandemic is to repurpose drugs that have been approved or in  
56 clinical trials for other diseases (3).

57 The ribonucleoside analogue, N4-hydroxycytidine (NHC, EIDD-1931), was initially developed as an  
58 influenza inhibitor, but exerts also broader-spectrum antiviral activity against multiple viruses belonging  
59 to different families of RNA viruses. Activity against SARS-CoV and SARS-CoV-2 has been reported in  
60 cell lines and primary human airway epithelial cell cultures (4). Acting through lethal mutagenesis, its  
61 incorporation into viral RNA results in the accumulation of deleterious transition mutations beyond a  
62 permissible error threshold to sustain the virus population, leading to error catastrophe (5). The orally  
63 bioavailable, pro-drug counterpart of NHC (6), Molnupiravir (EIDD-2801, MK-4482) is currently being  
64 assessed for its potential as an antiviral treatment of SARS-CoV-2 infection in Phase 2 clinical trials of

65 infected patients (NCT04405570, NCT04405739). To our knowledge, three recent studies reported on  
66 the activity of orally dosed EIDD-2801 in SARS-CoV-2 infected animals. Oral treatment of SARS-CoV-2  
67 infected Syrian hamsters with high doses of EIDD-2801 was reported to result in marked reduction (1  
68 to 2 log<sub>10</sub>) of viral loads when administered either in a pre-exposure (12h before infection) or post-  
69 exposure (start of treatment 12h post-infection, pi) settings (7). In a ferret model infection model,  
70 EIDD-2801 was reported to significantly reduce virus loads in the lungs when start of treatment was  
71 delayed until 12 or 36h pi and to block also SARS-CoV-2 contact transmission (8). In a humanized mouse  
72 model i.e. implanted with human lung tissues, EIDD-2801 prevented SARS-CoV-2 infection in a pre-  
73 exposure prophylaxis setting (9).

74 We recently demonstrated that the influenza drug Favipiravir results in a pronounced antiviral activity  
75 in SARS-CoV-2 infected hamsters, whereas hydroxychloroquine lacks antiviral activity in this model.  
76 Here, we use the same hamster model to obtain further information on the antiviral activity of EIDD-  
77 2801 either when used alone or in combination with favipiravir.

## 78 **Results**

### 79 ***In vivo* efficacy of EIDD-2801 against SARS-CoV-2 at the time of infection**

80 First, we evaluated the dose-response effect of EIDD-2801 in SARS-CoV-2-infected hamsters. Briefly,  
81 6-8 weeks female SG hamsters were treated orally with EIDD-2801 (either 75, 150, 200 or 500 mg/kg,  
82 BID) or the vehicle (i.e. the control group) for four consecutive days starting one hour before intranasal  
83 infection with SARS-CoV-2 [BetaCov/Belgium/GHB-03021/2020 (EPI ISL 109 407976|2020-02-03)]. At  
84 day four post-infection (pi), the animals were euthanized and lungs were collected for quantification  
85 of viral RNA, infectious virus titers and lung histopathology as described previously (10) (Fig. 1A). EIDD-  
86 2801 treatment resulted in a dose-dependent reduction in the viral RNA copies per mg of lung tissue  
87 with 1.3 (P=0.002), 1.9 (P<0.0001), 3.3 (P<0.0001) and 2.8 (P=0.01) log<sub>10</sub> reduction was noted in the  
88 groups that had been treated BID with 75, 150, 200 and 500 mg/kg, respectively (Fig. 1B). A similar  
89 pattern was observed for the infectious virus load in the lungs whereas the high doses, but not the 75

90 mg/kg dose BID, significantly reduced infectious virus lung titers (Fig. 1C). The reduction in infectious  
91 virus titers (TCID<sub>50</sub> / mg tissue) in the lungs of hamsters treated BID with 150, 200 and 500 mg/kg was  
92 1.3 (P=0.0002), 3.5 (P<0.0001) and 1 (P=0.0002) log<sub>10</sub>, respectively (Fig. 1C). However, some variations  
93 in viral loads reduction was observed in the group treated with the highest dose.

94 Treatment with 75 and 200 mg/kg EIDD-2801 BID significantly reduced the histological lung disease  
95 score (P=0.0025; P<0.0001), because of a large variation no such inhibition was observed at 150 mg/kg  
96 and likewise and surprisingly no significant protective activity was noted at the highest dose used (Fig.  
97 1D). All the doses studied were well tolerated without significant weight loss or any obvious adverse  
98 effects (Fig. 1E).

#### 99 ***In vivo* efficacy of EIDD-2801 against SARS-CoV-2 in a post-exposure setting**

100 We next explored whether delayed EIDD-2801 treatment (started at 24 h after infection) (Fig. 2A) has  
101 an impact on the infection. Delaying the start of treatment with EIDD-2801 (200 mg/kg or 500 mg/kg  
102 BID) by 1 day resulted in 0.4 (P=0.03) and 1 (P=0.05, ns) log<sub>10</sub> reduction of viral RNA copies/mg lung,  
103 respectively (Fig. 2B). Likewise no substantial reduction of infectious virus load in the 200 mg/kg Day  
104 1 group was noted, whereas a modest but significant reduction [1 log<sub>10</sub> reduction in TCID<sub>50</sub>/mg lung  
105 tissue (P=0.0003)] in the 500 mg/kg Day 1 group was observed (Fig. 2C). A modest reduction of the  
106 histological lung disease score was observed in the 200 mg/kg (P=0.0007) and 500 mg/kg (P=0.27, ns)  
107 Day 1 treatment groups (Fig. 2D). Thus even if the delayed start of treatment with EIDD-2801 is not  
108 sufficient to efficiently stop viral replication, the drug may still able to delay to some extent disease  
109 progression.

#### 110 **Effect of the combined treatment of EIDD-2801 and favipiravir**

111 We earlier demonstrated that a high dose of favipiravir (i.e. 500 mg/kg, BID) can reduce infectious  
112 virus loads of SARS-CoV2 in the lungs of hamsters to undetectable levels. We here set out to explore  
113 whether a similar potency can be achieved by combined treatment of SARS-CoV-2-infected hamsters  
114 with suboptimal doses of either favipiravir and EIDD-2801 (Fig. 3A). Single treatment with favipiravir

115 (300 mg/kg, BID, intraperitoneal injection) reduced viral RNA and infectious virus loads in the lungs of  
116 infected hamsters by 0.7 (P=0.0009) and 1.2 (P=0.0002) log<sub>10</sub>/ mg lung tissue, respectively (Fig. 3B/C).  
117 When combined with EIDD-2801 (150 mg/kg, BID), additional reduction in viral RNA loads in the lungs  
118 (2.7 log<sub>10</sub> per mg lung, P<0.0001) was noted compared to the hamsters treated solely with either  
119 compound (Fig. 3B). Interestingly, a significant enhanced reduction in infectious virus titers (4.5 log<sub>10</sub>  
120 TCID<sub>50</sub> per mg lung, P<0.0001) was observed in the combination group as compared to the groups  
121 treated with either compound alone (Fig. 3C). Notably, six out of ten hamsters in the combined  
122 treatment group had no detectable infectious virus in their lungs (Fig. 3C). A modest but significant  
123 (P=0.03) improvement in the histological lung pathology scores was also observed in the combined  
124 treatment group (Fig. 3D). No significant weight loss or toxicity signs were observed in the combined  
125 treatment group (Fig. 3E).

## 126 **Discussion**

127 Using a SARS-CoV2 hamster model (10, 11), we here show that EIDD-2801 can markedly reduce, albeit  
128 at a relatively high dose, SARS-CoV-2 infection and virus induced pathology in particular when  
129 treatment is started at the time of infection. In another study (7) a dose of 250 mg/kg of EIDD-2801,  
130 (given orally every 12 hours starting 12 hours pre-infection) was less effective (1 log<sub>10</sub> reduction in viral  
131 RNA and 2 log<sub>10</sub> reduction in infectious virus titers) than the 200 mg/kg BID dose in our study, despite  
132 the fact that the authors used a much lower virus inoculum (5×10<sup>2</sup> TCID<sub>50</sub>) than was the case in our  
133 study.

134 EIDD-2801 has also been reported to be effective in SARS-CoV infected C57/BL6 mice either when  
135 administered prophylactically (start of treatment 2 h before infection) or therapeutically (start of  
136 treatment delayed until 48 hpi) at a dose of 500 mg/kg twice daily (4). In a humanized mouse model  
137 of SARS-CoV-2 infection, pre-exposure (12 h before infection) with 500 mg/kg of EIDD-2801 twice daily  
138 was efficacious in preventing SARS-CoV-2 infection, with a ~6 log<sub>10</sub> reduction in virus lung titers (9).  
139 Recently, EIDD-2801 (15 mg/kg, BID) was found to markedly reduce SARS-CoV-2 viral titers in the upper

140 respiratory tract of ferrets when start of treatment was delayed until 12 hpi to 36 hpi. EIDD-2801, when  
141 treatment was initiated at 12 hpi, also prevented contact transmission when treated SARS-CoV-2-  
142 infected animals were co-housed with non-infected untreated sentinels (8).

143 Our results are consistent with other recent studies (in hamster, mouse and ferret models) showing  
144 that pre-emptive and early intervention with high doses of orally given EIDD-2801 results in antiviral  
145 activity. In our Syrian hamster model, the delayed treatment with a dose of 500 mg/kg resulted 1 log<sub>10</sub>  
146 reduction of viral RNA and infectious virus loads in the lung when treatment was initiated 24 hpi.  
147 However, a slight improvement in lung pathology was observed in this group.

148 The antiviral drug, Remdesivir (Veklury), is the first drug to receive FDA approval for use in hospitalised  
149 COVID19 patients, although the World Health Organisation has recently recommended against its use  
150 (<https://www.fda.gov/news-events/press-announcements/fda-approves-first-treatment-covid-19>;  
151 [https://www.who.int/news-room/feature-stories/detail/who-recommends-against-the-use-of-](https://www.who.int/news-room/feature-stories/detail/who-recommends-against-the-use-of-remdesivir-in-covid-19-patients)  
152 [remdesivir-in-covid-19-patients](https://www.who.int/news-room/feature-stories/detail/who-recommends-against-the-use-of-remdesivir-in-covid-19-patients)). Both Remdesivir and EIDD-2801 are nucleoside analogues acting on  
153 the viral RNA replication pathway, with Remdesivir resulting in chain termination and EIDD-2801 in  
154 lethal mutagenesis (5, 11). Additionally, both have a high barrier to resistance and resistant variants  
155 have a loss in fitness (6, 12). Remdesivir needs to be administrated intravenously which precludes its  
156 use in the early stages of the infection/disease or even prophylactic use. On the other hand, EIDD-2801  
157 can be dosed via the oral route.

158 Favipiravir is another broad-spectrum antiviral drug that can be dosed orally, which is currently being  
159 studied in clinical trials against SARS-CoV-2 in several countries (13). Similar to EIDD-2801, favipiravir  
160 has been reported to interact with the viral polymerase of several viruses and to induce lethal  
161 mutagenesis in small animal models (14). We previously showed that treatment of SARS-CoV-2-  
162 infected hamsters with a high doses of favipiravir can reduce infectious titers in the lungs to  
163 undetectable and markedly improves lung histopathology (10). Interestingly, combination treatment  
164 of SARS-CoV-2-infected hamsters with moderate doses of both favipiravir (300 mg/kg, BID) and EIDD-

165 2801 (150 mg/kg, BID) resulted in a complete reduction of infectious virus titers in 6 out of 10 treated  
166 animals, with a median reduction of 4.5 log<sub>10</sub> TCID<sub>50</sub>/mg lung tissue, which could not be achieved by  
167 single treatment with either compound. This reduction in the lung viral loads in the hamsters treated  
168 with combined therapy is comparable to the one achieved using a favipiravir dose of 500 mg/kg, BID  
169 (with a loading dose of 600 mg/kg, BID in the first day) in our previous study (10). These results suggest  
170 that EIDD-2801 may enhance the efficacy of favipiravir in COVID-19 patients and therefore lower doses  
171 of both compounds could be administered.

172 By demonstrating the antiviral effect of orally-dosed EIDD-2801 in the SARS-CoV-2 hamster infection  
173 model, either alone or in combination with favipiravir, we contribute to the pre-clinical profiling of  
174 EIDD-2801, and provide further evidence in support of the ongoing clinical trials. Our data lend support  
175 to plan clinical studies in which the combined efficacy of Molnupiravir and favipiravir is explored.

176



## 177 **Materials and methods**

### 178 **SARS-CoV-2**

179 The SARS-CoV-2 strain used in this study, BetaCov/Belgium/GHB-03021/2020 (EPI ISL 109  
180 407976|2020-02-03), was recovered from a nasopharyngeal swab taken from an RT-qPCR confirmed  
181 asymptomatic patient who returned from Wuhan, China in the beginning of February 2020. A close  
182 relation with the prototypic Wuhan-Hu-1 2019-nCoV (GenBank accession 112 number MN908947.3)  
183 strain was confirmed by phylogenetic analysis. Infectious virus was isolated by serial passaging on  
184 HuH7 and Vero E6 cells (10); passage 6 virus was used for the study described here. The titer of the  
185 virus stock was determined by end-point dilution on Vero E6 cells by the Reed and Muench method  
186 (15). Live virus-related work was conducted in the high-containment A3 and BSL3+ facilities of the KU  
187 Leuven Rega Institute (3CAPS) under licenses AMV 30112018 SBB 219 2018 0892 and AMV 23102017  
188 SBB 219 20170589 according to institutional guidelines.

### 189 **Cells**

190 Vero E6 cells (African green monkey kidney, ATCC CRL-1586) were cultured in minimal essential  
191 medium (Gibco) supplemented with 10% fetal bovine serum (Integro), 1% L- glutamine (Gibco) and 1%  
192 bicarbonate (Gibco). End-point titrations were performed with medium containing 2% fetal bovine  
193 serum instead of 10%.

### 194 **Compounds**

195 For the first pilot experiment, EIDD-2801 was kindly provided by Calibr at Scripps Research (USA). For  
196 further studies, EIDD-2801 was purchased from Excenen Pharmatech Co., Ltd (China) and was  
197 formulated as 50 or 100 mg/ml (for groups with the highest dose) stocks in a vehicle containing  
198 10%PEG400 and 2.5% Kolliphor-EL in water. Favipiravir was purchased from BOC Sciences (USA) and  
199 was formulated as a 50 mg/mL stock in 3% sodium bicarbonate.

### 200 **SARS-CoV-2 infection model in hamsters**

201 The hamster infection model of SARS-CoV-2 has been described before (10). In brief, wild-type Syrian  
202 Golden hamsters (*Mesocricetus auratus*) were purchased from Janvier Laboratories and were housed  
203 per two in ventilated isolator cages (IsoCage N Biocontainment System, Tecniplast) with ad libitum  
204 access to food and water and cage enrichment (wood block). The animals were acclimated for 4 days  
205 prior to study start. Housing conditions and experimental procedures were approved by the ethics  
206 committee of animal experimentation of KU Leuven (license P065-2020). Female hamsters of 6-8  
207 weeks old were anesthetized with ketamine/xylazine/atropine and inoculated intranasally with 50  $\mu$ L  
208 containing  $2 \times 10^6$  TCID<sub>50</sub> SARS-CoV-2 (day 0).

### 209 **Treatment regimen**

210 For D0 treatment, animals were treated twice daily with 75, 150, 200 or 500 mg/kg of EIDD-2801 by  
211 oral gavage just before infection with SARS-CoV-2. For delayed treatment groups, animals were treated  
212 with either, 200 or 500 mg/kg of EIDD-2801 starting from day1 post-infection (pi) by oral gavage. For  
213 combination therapy, hamsters were treated from day0 with 150 mg/kg EIDD-2801 (oral gavage) and  
214 300 mg/kg favipiravir (intraperitoneal, i.p.) twice daily. All the treatments continued until day 3 pi.  
215 Hamsters were monitored for appearance, behavior and weight. At day 4 pi, hamsters were euthanized  
216 by i.p. injection of 500  $\mu$ L Dolethal (200mg/mL sodium pentobarbital, V  toquinol SA). Lungs were  
217 collected and viral RNA and infectious virus were quantified by RT-qPCR and end-point virus titration,  
218 respectively.

### 219 **SARS-CoV-2 RT-qPCR**

220 Hamster lung tissues were collected after sacrifice and were homogenized using bead disruption  
221 (Precellys) in 350  $\mu$ L RLT buffer (RNeasy Mini kit, Qiagen) and centrifuged (10.000 rpm, 5 min) to pellet  
222 the cell debris. RNA was extracted according to the manufacturer's instructions. Of 50  $\mu$ L eluate, 4  $\mu$ L  
223 was used as a template in RT-qPCR reactions. RT-qPCR was performed on a LightCycler96 platform  
224 (Roche) using the iTaq Universal Probes One-Step RT-qPCR kit (BioRad) with N2 primers and probes

225 targeting the nucleocapsid (10). Standards of SARS-CoV-2 cDNA (IDT) were used to express viral  
226 genome copies per mg tissue or per mL serum.

### 227 **End-point virus titrations**

228 Lung tissues were homogenized using bead disruption (Precellys) in 350  $\mu$ L minimal essential medium  
229 and centrifuged (10,000 rpm, 5min, 4°C) to pellet the cell debris. To quantify infectious SARS-CoV-2  
230 particles, endpoint titrations were performed on confluent Vero E6 cells in 96- well plates. Viral titers  
231 were calculated by the Reed and Muench method (15) using the Lindenbach calculator and were  
232 expressed as 50% tissue culture infectious dose (TCID<sub>50</sub>) per mg tissue.

### 233 **Histology**

234 For histological examination, the lungs were fixed overnight in 4% formaldehyde and embedded in  
235 paraffin. Tissue sections (5  $\mu$ m) were analyzed after staining with hematoxylin and eosin and scored  
236 blindly for lung damage by an expert pathologist. The scored parameters, to which a cumulative score  
237 of 1 to 3 was attributed, were the following: congestion, intra-alveolar hemorrhagic, apoptotic bodies  
238 in bronchus wall, necrotizing bronchiolitis, perivascular edema, bronchopneumonia, perivascular  
239 inflammation, peribronchial inflammation and vasculitis.

### 240 **Statistics**

241 GraphPad Prism (GraphPad Software, Inc.) was used to perform statistical analysis. Statistical  
242 significance was determined using the non-parametric Mann Whitney U-test. P-values of  $\leq 0.05$  were  
243 considered significant.

244

245 **Acknowledgments**

246 We thank Carolien De Keyzer, Lindsey Bervoets, Thibault Francken, Elke Maas, Jasper Rymenants, Birgit  
247 Voeten, Dagmar Buyst, Niels Cremers, Bo Corbeels and Kathleen Van den Eynde for excellent technical  
248 assistance. We are grateful to Piet Maes for kindly providing the SARS-CoV-2 strain used in this study.  
249 We thank Jef Arnout and Annelies Sterckx (KU Leuven Faculty of Medicine, Biomedical Sciences Group  
250 Management) and Animalia and Biosafety Departments of KU Leuven for facilitating the animal  
251 studies. This project has received funding from the Covid-19-Fund KU Leuven/UZ Leuven and the  
252 COVID-19 call of FWO (G0G4820N), the European Union's Horizon 2020 research and innovation  
253 program under grant agreements No 101003627 (SCORE project) and Bill & Melinda Gates Foundation  
254 (BGMF) under grant agreement INV-00636. R.A., C.S.F. and L.L. were supported by a KU Leuven internal  
255 project fund. X.Z. received funding of the China Scholarship Council (grant No.201906170033).

256 **Competing Interest Statement:** None to declare.

257

258 **References**

- 259 1. N. Zhu, *et al.*, A Novel Coronavirus from Patients with Pneumonia in China, 2019. *N. Engl. J.*  
260 *Med.* **382**, 727–733 (2020).
- 261 2. M. Z. Tay, C. M. Poh, L. Rénia, P. A. MacAry, L. F. P. Ng, The trinity of COVID-19: immunity,  
262 inflammation and intervention. *Nat. Rev. Immunol.* **20**, 363–374 (2020).
- 263 3. L. Delang, J. Neyts, Medical treatment options for COVID-19. *Eur. Hear. J. Acute Cardiovasc.*  
264 *Care*, 204887262092279 (2020).
- 265 4. T. P. Sheahan, *et al.*, An orally bioavailable broad-spectrum antiviral inhibits SARS-CoV-2 in  
266 human airway epithelial cell cultures and multiple coronaviruses in mice. *Sci. Transl. Med.* **12**  
267 (2020).
- 268 5. N. Urakova, *et al.*,  $\beta$ -D- N 4 -Hydroxycytidine Is a Potent Anti-alphavirus Compound That  
269 Induces a High Level of Mutations in the Viral Genome . *J. Virol.* **92** (2017).
- 270 6. M. Toots, *et al.*, Characterization of orally efficacious influenza drug with high resistance  
271 barrier in ferrets and human airway epithelia. *Sci. Transl. Med.* **11** (2019).
- 272 7. K. Rosenke, *et al.*, Orally delivered MK-4482 inhibits SARS-CoV-2 replication in the Syrian  
273 hamster model. *Res. Sq.* (2020).
- 274 8. R. M. Cox, J. D. Wolf, R. K. Plemper, Therapeutically administered ribonucleoside analogue  
275 MK-4482/EIDD-2801 blocks SARS-CoV-2 transmission in ferrets. *Nat. Microbiol.* (2020).
- 276 9. A. Wahl, *et al.*, Acute SARS-CoV-2 Infection is Highly Cytopathic, Elicits a Robust Innate  
277 Immune Response and is Efficiently Prevented by EIDD-2801. *Res. Sq.* (2020).
- 278 10. S. J. F. Kaptein, *et al.*, Favipiravir at high doses has potent antiviral activity in SARS-CoV-  
279 2–infected hamsters, whereas hydroxychloroquine lacks activity. *Proc. Natl. Acad. Sci. U. S. A.*  
280 **117**, 26955–26965 (2020).

- 281 11. T. P. Sheahan, *et al.*, Broad-spectrum antiviral GS-5734 inhibits both epidemic and zoonotic  
282 coronaviruses. *Sci. Transl. Med.* **9** (2017).
- 283 12. M. L. Agostini, *et al.*, Coronavirus susceptibility to the antiviral remdesivir (GS-5734) is  
284 mediated by the viral polymerase and the proofreading exoribonuclease. *MBio* **9** (2018).
- 285 13. Y. X. Du, X. P. Chen, Favipiravir: Pharmacokinetics and Concerns About Clinical Trials for 2019-  
286 nCoV Infection. *Clin. Pharmacol. Ther.* **108**, 242–247 (2020).
- 287 14. L. Delang, R. Abdelnabi, J. Neyts, Favipiravir as a potential countermeasure against neglected  
288 and emerging RNA viruses. *Antiviral Res.* **153**, 85–94 (2018).
- 289 15. L. J. Reed, H. Muench, A simple method of estimating fifty percent endpoints. *Am. J. Hyg.* **27**,  
290 493–497 (1938).

291

292

293

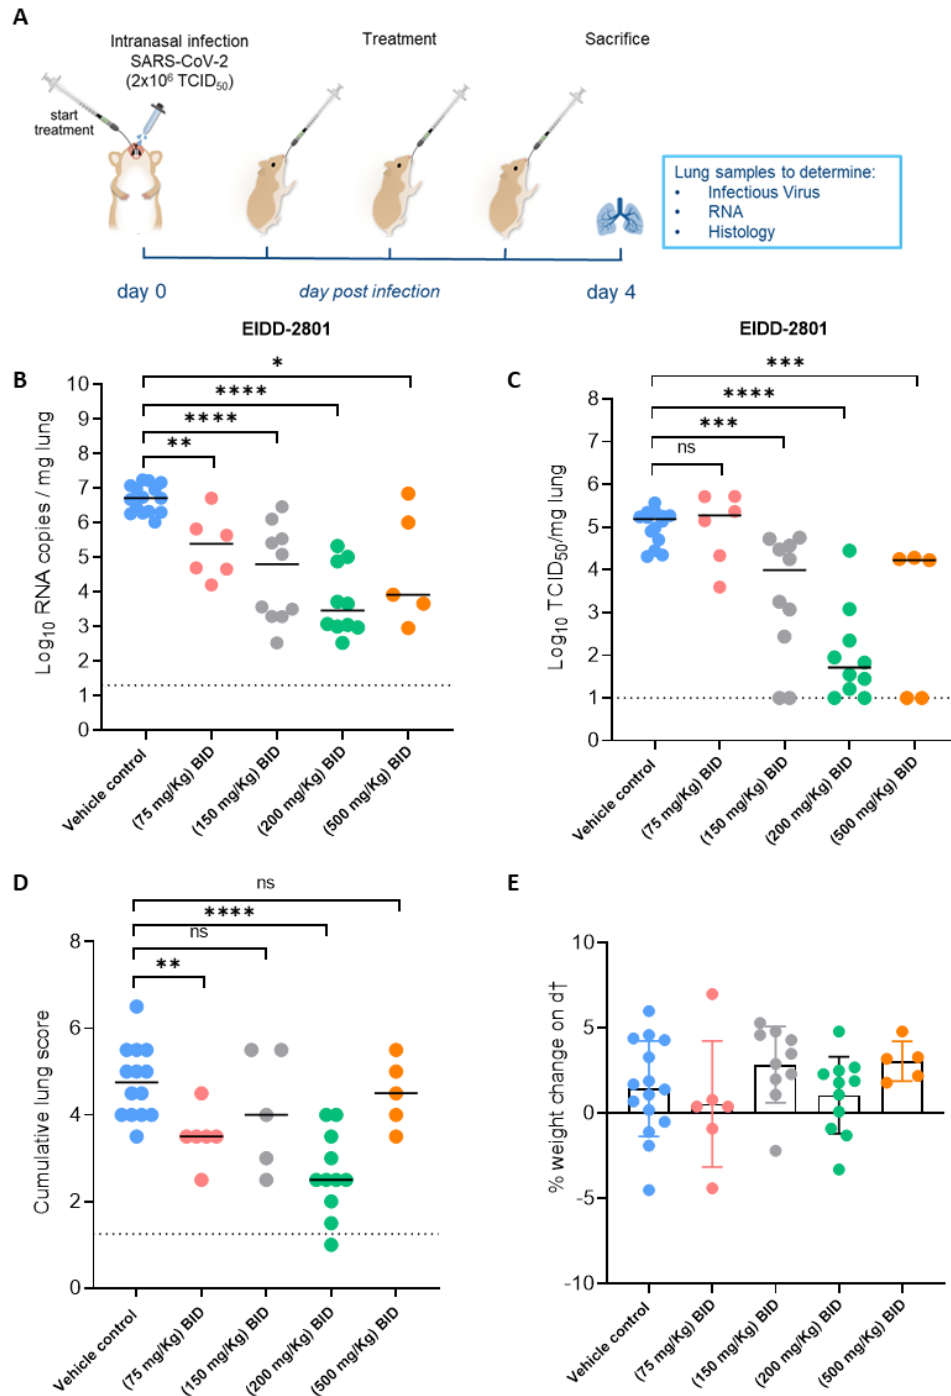

294

295 **Fig.1. In vivo efficacy of EIDD-2801 against SARS-CoV-2 at the time of infection.** (A) Set-up of the study. (B) Viral  
 296 RNA levels in the lungs of control (vehicle-treated) and EIDD-2801-treated (75, 150, 200 or 500 mg/kg, BID) SARS-  
 297 CoV-2-infected hamsters at day 4 post-infection (pi) are expressed as log<sub>10</sub> SARS-CoV-2 RNA copies per mg lung  
 298 tissue. Individual data and median values are presented. (C) Infectious viral loads in the lungs of control (vehicle-  
 299 treated) and EIDD-2801-treated SARS-CoV-2-infected hamsters at day 4 pi are expressed as log<sub>10</sub> TCID<sub>50</sub> per mg  
 300 lung tissue. Individual data and median values are presented. (D) Cumulative severity score from H&E stained  
 301 slides of lungs from control (vehicle-treated) and EIDD-2801-treated SARS-CoV-2-infected hamsters. Individual  
 302 data and median values are presented and the dotted line represents the median score of untreated non-infected  
 303 hamsters. (E) Weight change at day 4 pi in percentage, normalized to the body weight at the time of infection.  
 304 Bars represent means  $\pm$  SD. Data were analyzed with the Mann-Whitney U test. \*P < 0.05, \*\*P < 0.01, \*\*\*P <  
 305 0.001, \*\*\*\*P < 0.0001, ns=non-significant. All data (panels B, C, D, E) are from two independent experiments  
 306 except for the 75 and 500 mg/kg groups with 15, 6, 10, 10, 5 animals for respectively the vehicle, 75, 150, 200  
 307 and 500 mg/kg condition.

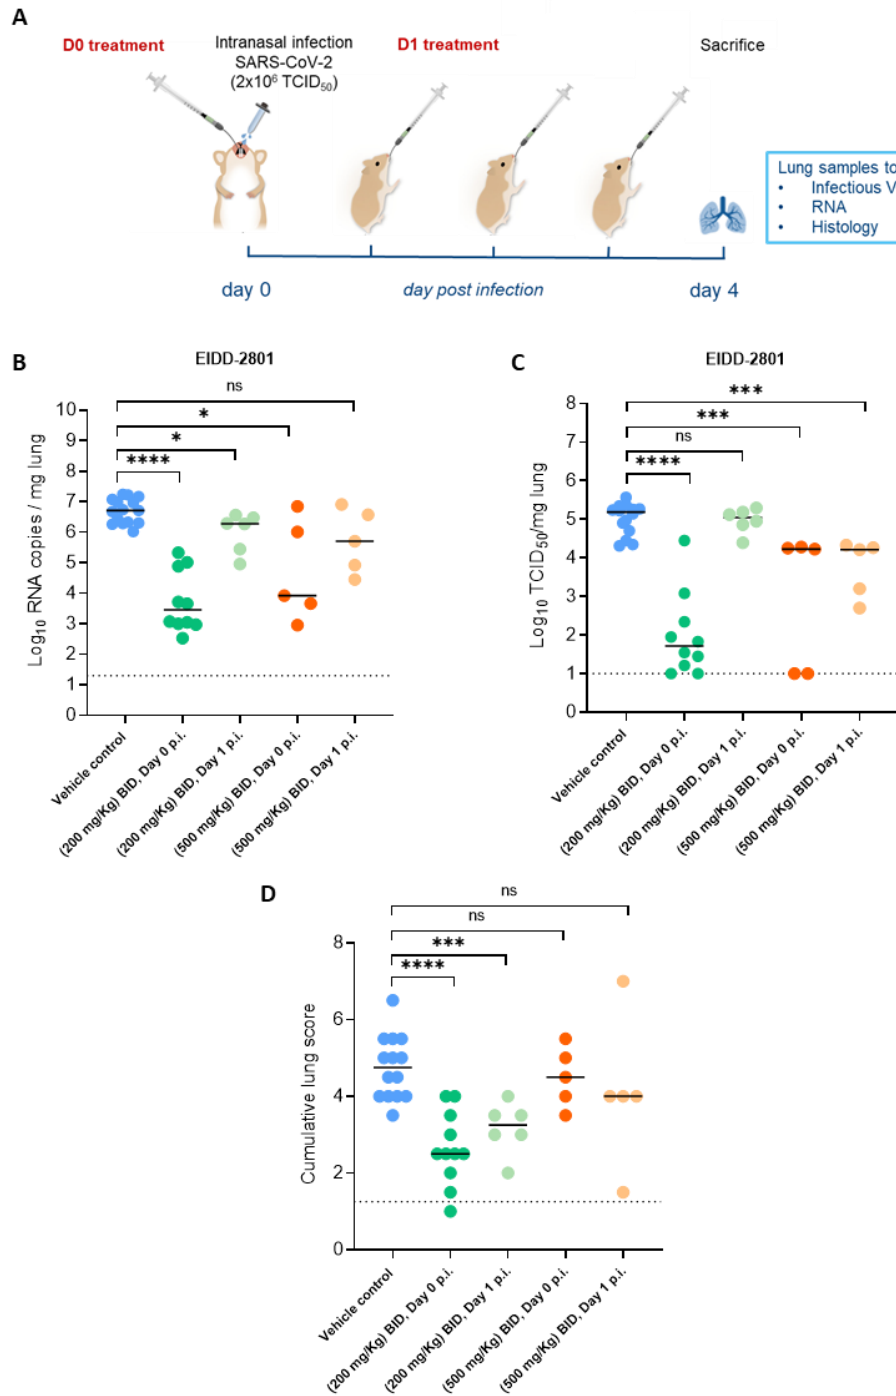

308

309 **Fig.2. *In vivo* efficacy of EIDD-2801 against SARS-CoV-2 in a post-exposure setting.** (A) Set-up of the study. (B)  
 310 Viral RNA levels in the lungs of control (vehicle-treated) and EIDD-2801-treated (200 or 500 mg/kg, BID starting  
 311 from day 0 or day 1 post-infection, p.i.) SARS-CoV-2-infected hamsters at day 4 post-infection (pi) are expressed  
 312 as log<sub>10</sub> SARS-CoV-2 RNA copies per mg lung tissue. Individual data and median values are presented. (C)  
 313 Infectious viral loads in the lungs of control (vehicle-treated) and EIDD-2801-treated SARS-CoV-2-infected  
 314 hamsters at day 4 pi are expressed as log<sub>10</sub> TCID<sub>50</sub> per mg lung tissue. Individual data and median values are  
 315 presented. (D) Cumulative severity score from H&E stained slides of lungs from control (vehicle-treated) and  
 316 EIDD-2801-treated SARS-CoV-2-infected hamsters. Individual data and median values are presented and the  
 317 dotted line represents the median score of untreated non-infected hamsters. Data were analyzed with the  
 318 Mann-Whitney U test. \*P < 0.05, \*\*\*P < 0.001, \*\*\*\*P < 0.0001, ns=non-significant. All data (panels B, C, D) are  
 319 from one experiment except for the vehicle and 200 mg/kg day 0 p.i. groups with 15, 10, 6, 5, 5 animals for  
 320 respectively the vehicle, 200 mg/kg day 0 p.i., 200 mg/kg day 1 p.i., 500 mg/kg day 0 p.i. and 500 mg/kg day1 p.i.  
 321 condition.



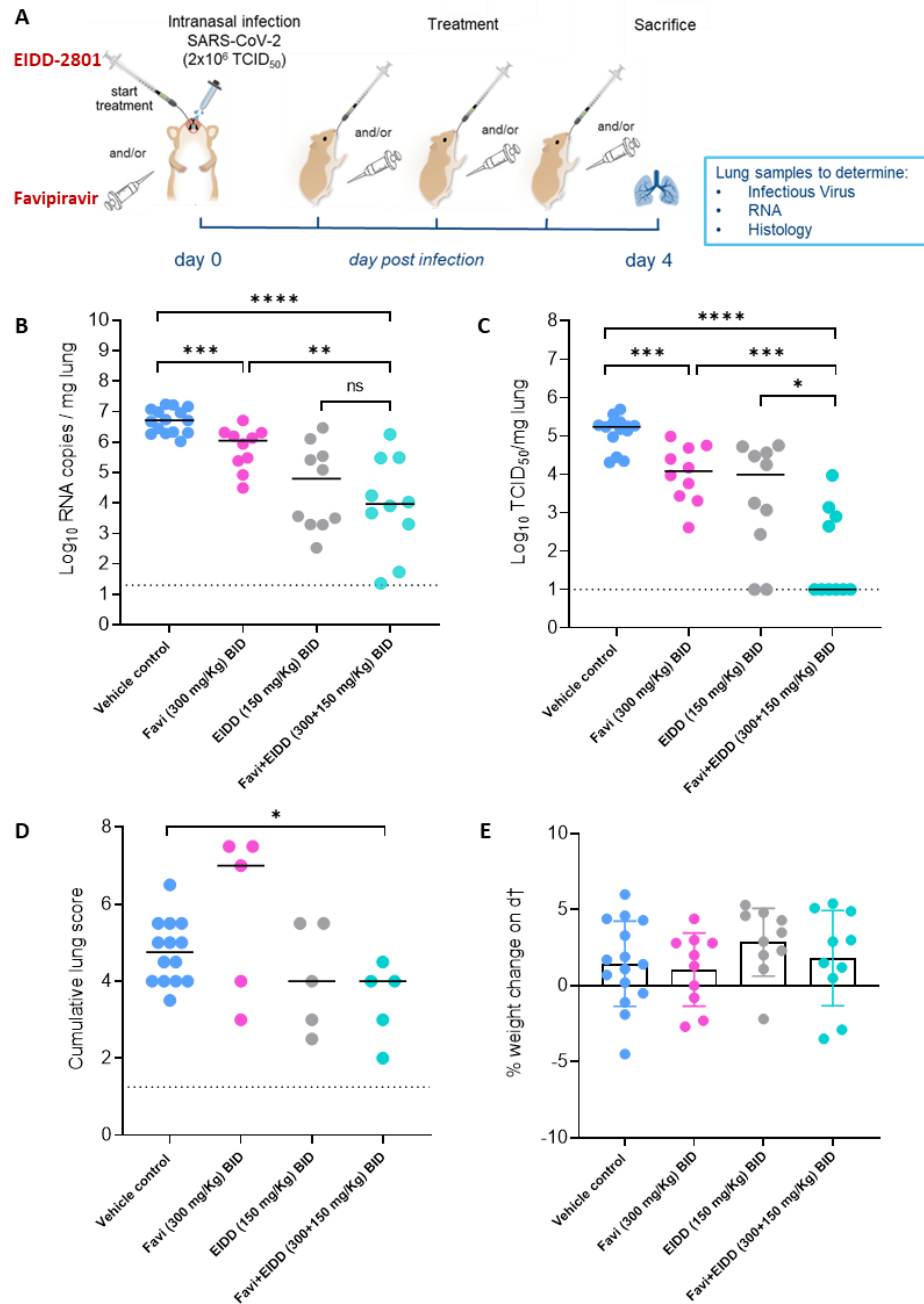

322

323 **Fig.3. In vivo efficacy of combined treatment with favipiravir and EIDD-2801 against SARS-CoV-2.** (A) Set-up of  
 324 the study. (B) Viral RNA levels in the lungs of control (vehicle-treated), favipiravir-treated (300 mg/kg, BID), EIDD-  
 325 2801-treated (150 mg/kg, BID) and combination-treated (favipiravir+EIDD-2801 at 300+150 mg/kg, BID,  
 326 respectively) SARS-CoV-2-infected hamsters at day 4 post-infection (pi) are expressed as log<sub>10</sub> SARS-CoV-2 RNA  
 327 copies per mg lung tissue. Individual data and median values are presented. (C) Infectious viral loads in the lungs  
 328 of control (vehicle-treated), favipiravir-treated, EIDD-2801-treated and combination-treated (favipiravir+EIDD-  
 329 2801) SARS-CoV-2-infected hamsters at day 4 pi are expressed as log<sub>10</sub> TCID<sub>50</sub> per mg lung tissue. Individual data  
 330 and median values are presented. (D) Cumulative severity score from H&E stained slides of lungs from control  
 331 (vehicle-treated), favipiravir-treated, EIDD-2801-treated and combination-treated (favipiravir+EIDD-2801) SARS-  
 332 CoV-2-infected hamsters. Individual data and median values are presented and the dotted line represents the  
 333 median score of untreated non-infected hamsters. (E) Weight change at day 4 pi in percentage, normalized to  
 334 the body weight at the time of infection. Bars represent means  $\pm$  SD. Data were analyzed with the Mann-Whitney  
 335 U test. \*P < 0.05, \*\*P < 0.01, \*\*\*P < 0.001, \*\*\*\*P < 0.0001, ns=non-significant. Favi=favipiravir, EIDD=EIDD-2801.  
 336 All data (panels B, C, D) are from two independent experiments with 15, 10, 10, 10 animals for respectively the  
 337 vehicle, Favipiravir 300 mg/kg, EIDD-2801 150 mg/kg and Favipiravir+EIDD-2801 condition.
